# Supplementary material for: Recruitment of Corticotropin-Releasing Hormone (CRH) Neurons in Categorically Distinct Stress Reactions in the Mouse Brain
Source: MDPI journal article supplement (doi:10.3390/ijms241411736), 2023-07-21
Supplement: s1 [file s1]

Supplementary figures:

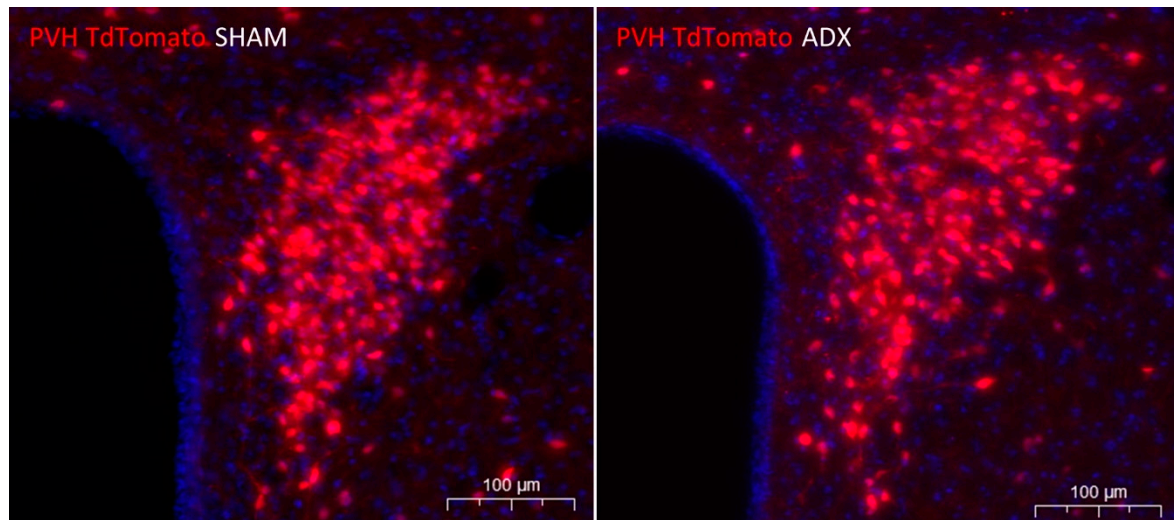

**Suppl. Figure S1.** TdTomato staining in the hypothalamic paraventricular nucleus (PVH) of sham operated (SHAM) and adrenalectomized (ADX) Crh-IRES-Cre;Ai9 mice.

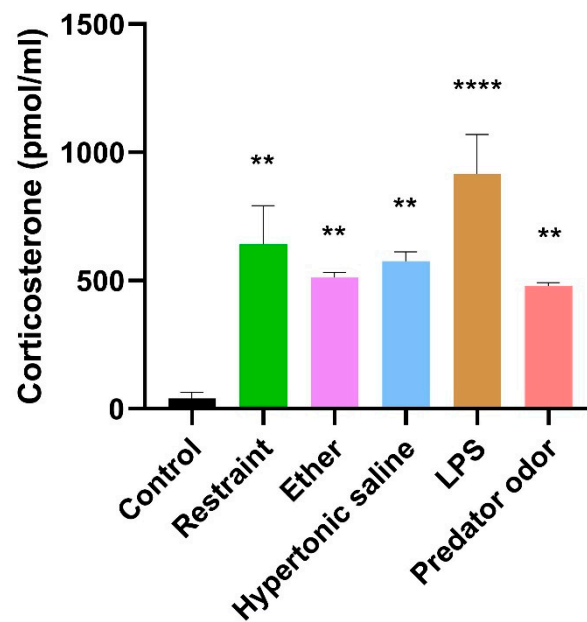

**Suppl. Figure S2.** Mean  $\pm$  SEM values of plasma corticosterone in animals exposed to different stressors. \*\* $p < 0.01$ ; \*\*\*\* $p < 0.0001$  compared to unstressed control.

|        | NE | IP saline |
|--------|----|-----------|
| MOBgl  | ns | ns        |
| MOBopl | ns | ns        |
| AON    | ns | ns        |
| TTv    | ns | ns        |
| DP     | ns | ns        |
| DTr    | ns | ns        |
| PIR    | ns | ns        |
| COA    | ns | ns        |
| NLOT   | ns | ns        |
| O      | ns | ns        |
| MOs    | ns | ns        |
| Ald    | ns | ns        |
| Mop    | ns | *         |
| LVOV   | ns | ns        |
| SSp    | ns | ns        |
| PL     | ns | ns        |
| ILA    | *  | ns        |
| GU     | *  | ns        |
| SSs    | ns | ns        |
| ACA    | ns | ns        |
| RSP    | ns | ns        |
| CA     | ns | ns        |
| DG     | ns | ns        |
| CA3    | ns | ns        |
| Epd    | ns | ns        |
| CLA    | ns | ns        |
| LS     | ns | ns        |
| FS     | ns | ns        |
| OT     | ns | ns        |
| CEA    | ns | ns        |
| MEA    | ns | ns        |
| BSTa   | ns | ns        |
| BSTad  | ns | ns        |
| BSTav  | ns | ns        |
| BSTp   | ns | ns        |
| BAC    | ns | ns        |
| PMTH   | ns | ns        |
| PIL    | ns | ns        |
| G      | ns | ns        |
| RH     | *  | ns        |
| CM     | *  | ns        |
| RE     | ns | ns        |
| PVTa   | ns | ns        |
| PVTp   | ns | ns        |
| CL     | *  | ns        |
| LGv    | ns | ns        |
| PeF    | ns | ns        |
| MCLHD  | ns | ns        |
| MCLHV  | ns | ns        |
| PVR    | ns | ns        |
| MPN    | ns | ns        |
| SCH    | ns | ns        |
| SO     | ns | ns        |
| PVH    | ** | ns        |
| AHNC   | ns | ns        |
| AHNp   | ** | ns        |
| LHA    | ns | ns        |
| VMH    | ns | ns        |
| ARH    | ns | ns        |
| STN    | ns | ns        |
| DMH    | ** | ns        |
| PHd    | ns | ns        |
| PHv    | ** | ns        |
| PSTN   | ns | ns        |
| PM     | ns | ns        |
| PHp    | ** | ns        |
| SUM    | ns | ns        |
| ZI     | ns | ns        |
| DpMe   | ns | ns        |
| PRC    | *  | ns        |
| PAG    | ns | ns        |
| EW     | ns | ns        |
| SCs    | ns | ns        |
| IF     | ns | ns        |
| IPN    | ns | ns        |
| PG     | ns | ns        |
| PGdm   | ns | *         |
| TRN    | ns | ns        |
| CS     | ns | ns        |
| PCG    | ns | ns        |
| LC     | ns | ns        |
| B      | ns | ns        |
| PRP    | ns | ns        |
| MV     | ns | ns        |
| CN     | ns | ns        |
| X      | ns | ns        |
| IO     | ns | ns        |
| RPA    | ** | ns        |
| DMX    | ns | ns        |
| AP     | ns | ns        |
| NTS    | ns | ns        |
| ECU    | ns | ns        |
| CU     | ns | ns        |
| LRN    | ns | ns        |
| XII    | ns | *         |

|        | NE | IP saline |
|--------|----|-----------|
| MOBgl  | ns | ns        |
| MOBopl | ns | ns        |
| AON    | ns | ns        |
| TTv    | ns | ns        |
| DP     | ns | ns        |
| DTr    | ns | ns        |
| PIR    | ns | ns        |
| COA    | ns | ns        |
| NLOT   | ns | ns        |
| O      | ns | ns        |
| MOs    | ns | ns        |
| Ald    | ns | ns        |
| Mop    | ns | ns        |
| LVOV   | ns | ns        |
| SSp    | ns | ns        |
| PL     | ns | ns        |
| ILA    | ns | ns        |
| GU     | ns | ns        |
| SSs    | ns | ns        |
| ACA    | ns | ns        |
| RSP    | ns | ns        |
| CA     | ns | ns        |
| DG     | ns | ns        |
| CA3    | ns | ns        |
| Epd    | ns | ns        |
| CLA    | ns | ns        |
| LS     | ns | ns        |
| FS     | ns | ns        |
| OT     | ns | ns        |
| CEA    | ns | ns        |
| MEA    | ns | ns        |
| BSTa   | ns | ns        |
| BSTad  | ns | ns        |
| BSTav  | ns | ns        |
| BSTp   | ns | ns        |
| BAC    | ns | ns        |
| PMTH   | ns | ns        |
| PIL    | ns | ns        |
| G      | ns | ns        |
| RH     | *  | ns        |
| CM     | ** | ns        |
| RE     | ns | ns        |
| PVTa   | ns | ns        |
| PVTp   | ns | ns        |
| CL     | *  | ns        |
| LGv    | ns | ns        |
| PeF    | *  | ns        |
| MCLHD  | ns | *         |
| MCLHV  | ns | ns        |
| PVR    | ns | ns        |
| MPN    | ns | ns        |
| SCH    | ns | ns        |
| SO     | ns | ns        |
| PVH    | ** | ns        |
| AHNC   | ns | ns        |
| AHNp   | ns | ns        |
| LHA    | ns | ns        |
| VMH    | ns | *         |
| ARH    | ns | ns        |
| STN    | ns | ns        |
| DMH    | ns | ns        |
| PHd    | ns | ns        |
| PHv    | ns | ns        |
| PSTN   | ns | ns        |
| PM     | ns | ns        |
| PHp    | ns | ns        |
| SUM    | ns | ns        |
| ZI     | ns | ns        |
| DpMe   | ns | ns        |
| PRC    | ns | ns        |
| PAG    | ns | ns        |
| EW     | ns | ns        |
| SCs    | ns | ns        |
| IF     | ns | ns        |
| IPN    | ns | ns        |
| PG     | ns | ns        |
| PGdm   | ns | ns        |
| TRN    | ns | ns        |
| CS     | ns | ns        |
| PCG    | ns | ns        |
| LC     | ns | ns        |
| B      | ns | ns        |
| PRP    | *  | ns        |
| MV     | ns | ns        |
| CN     | ns | ns        |
| X      | ns | ns        |
| IO     | ns | ns        |
| RPA    | ns | ns        |
| DMX    | ns | ns        |
| AP     | ns | ns        |
| NTS    | ns | ns        |
| ECU    | ns | ns        |
| CU     | *  | ns        |
| LRN    | ns | ns        |
| XII    | ns | ns        |

|                       |
|-----------------------|
| Olfactory areas       |
| Isocortex             |
| Hippocampal formation |
| CTXsp                 |
| Striatum              |
| Pallidum              |
| Thalamus              |
| Hypothalamus          |
| Midbrain              |
| Pons                  |
| Medulla               |

**Suppl. Figure S3.** Significance levels of differences seen between animals exposed to novel environment (NE) or intraperitoneal injection of saline and non-stressed (absolute) controls. (A) neuronal activation (FOS) and (B) colocalization (FOS + tdTomato).  $p^* < 0.05$ ;  $p^{**} < 0.01$ ;  $p^{***} < 0.001$ ; ns = not significant.
